# Supplementary material for: Comprehensive analysis of Fc-mediated IgM binding to the Plasmodium falciparum erythrocyte membrane protein 1 family in three parasite clones
Source: PubMed Central journal article supplement (PMC6465264; doi:10.1038/s41598-019-42585-0), 2019-04-15
Supplement: 41598_2019_42585_MOESM1_ESM.pdf [file 41598_2019_42585_MOESM1_ESM.pdf]

## Supplementary data for

### **Comprehensive analysis of Fc-mediated IgM binding to the *Plasmodium falciparum* erythrocyte membrane protein 1 family in three parasite clones**

Maria del Pilar Quintana<sup>1</sup>, Gertrude Ecklu-Mensah<sup>1,3</sup>, Sergey O. Tcherniuk<sup>4</sup>, Sisse Bolm Ditlev<sup>1</sup>, Andrew V Oleinikov<sup>4</sup>, Lars Hviid<sup>1,2#</sup> and Mary Lopez-Perez<sup>1</sup>

**Figure S1. Erasure of epigenetic memory by pVBH transfection**

Relative proportions of *var* gene transcripts in *P. falciparum* 3D7 (top), HB3 (center), and IT4 (bottom) before pVBH transfection (left), after transfection under blasticidin drug pressure (center), and two weeks after release from drug pressure (right). \* As detailed in ref. 1.

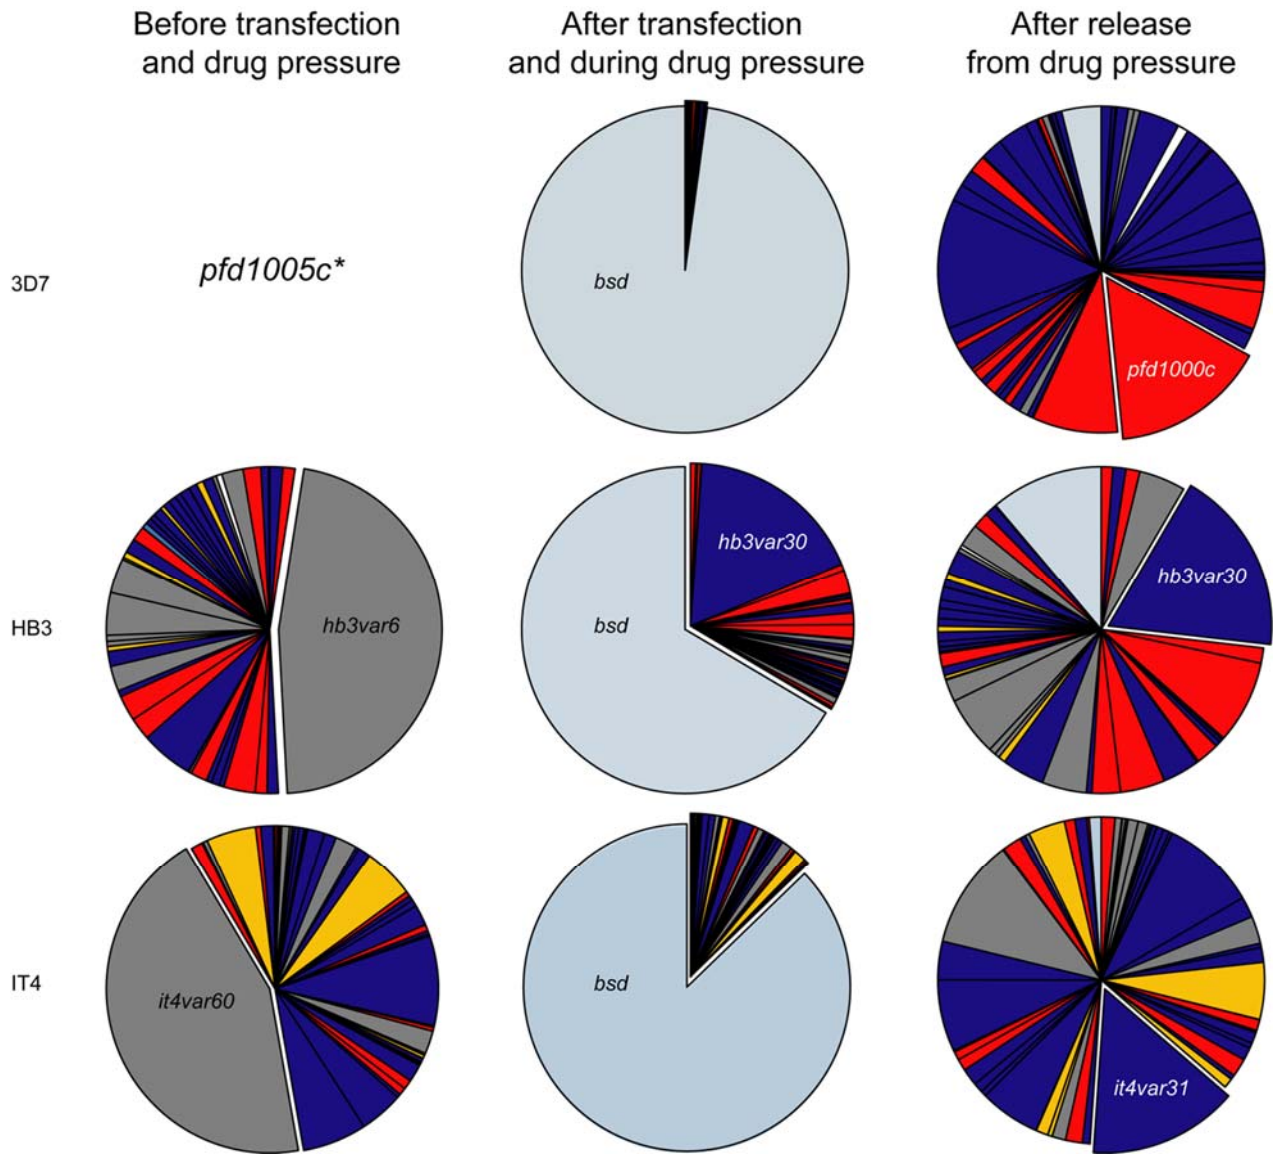

**Figure S2. Transcription of var genes in selected *P. falciparum* 3D7, HB3 and IT4 sub-clones**

Data presented as in Fig. 2.

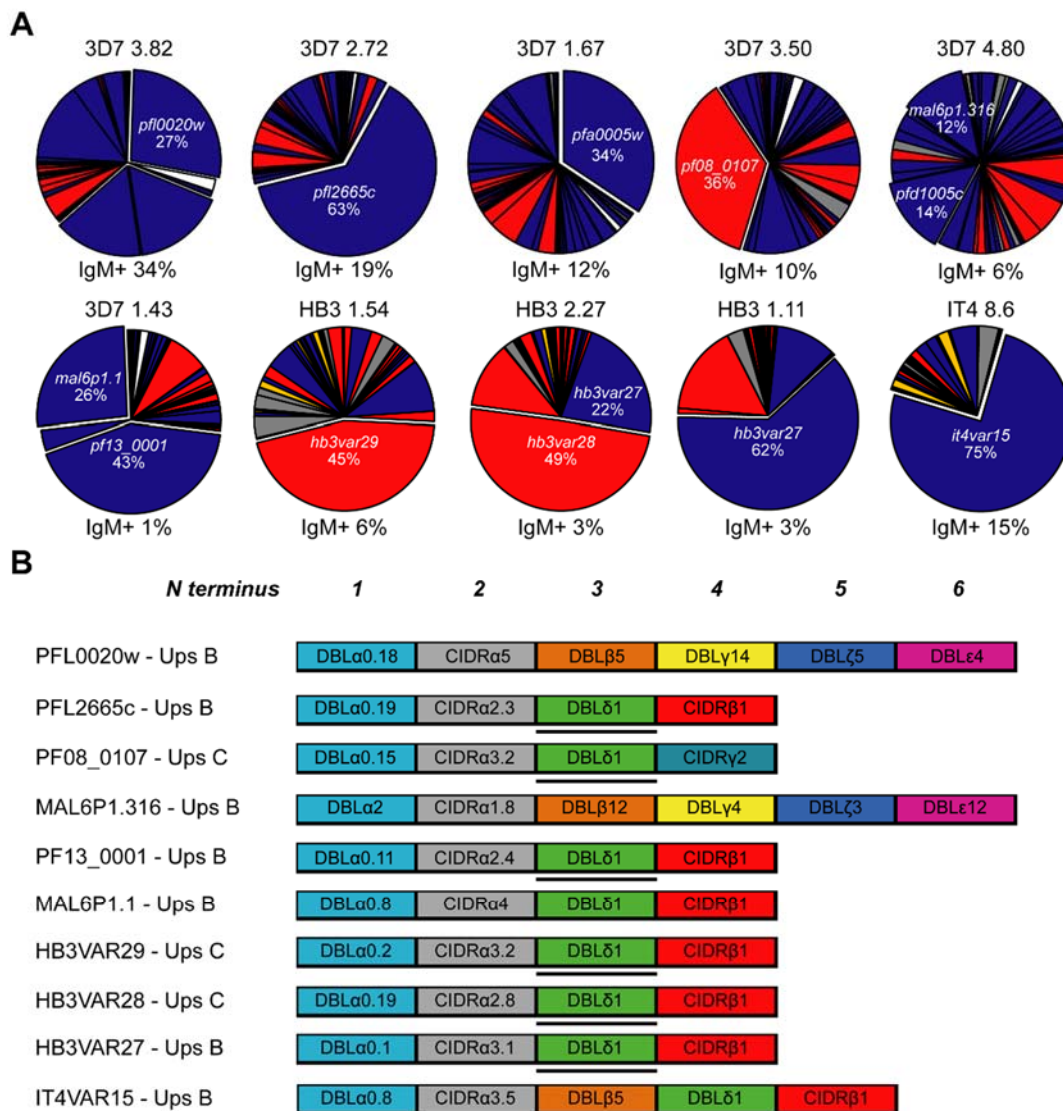

**Figure S3. PfEMP1 domains binding to non-immune IgM on ELISA**

Data presented as in Fig. 3.

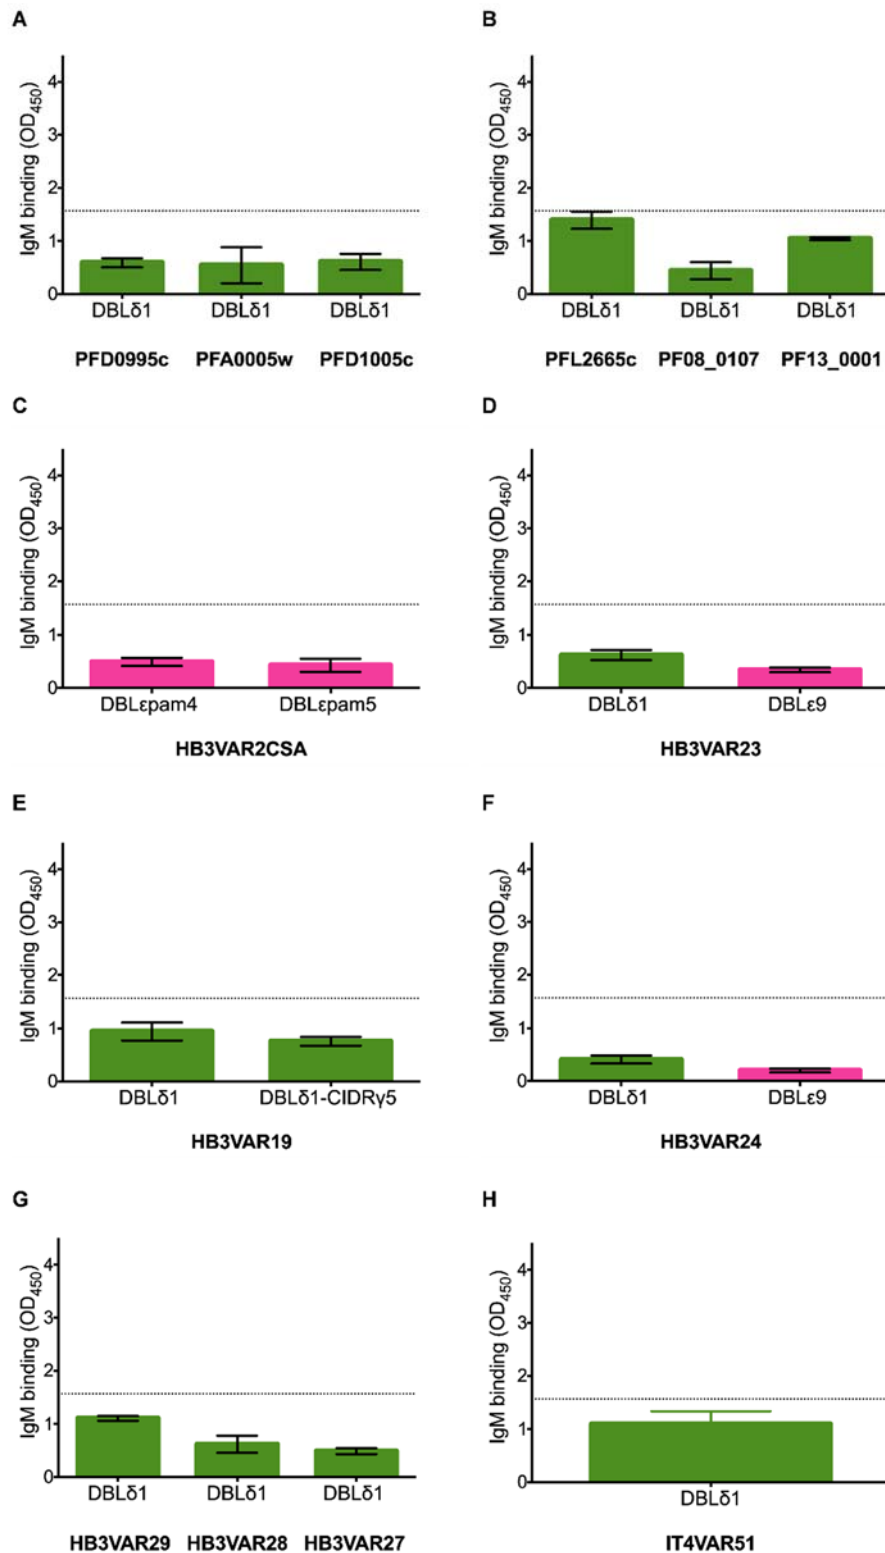

**Figure S4. PfEMP1 domains binding to non-immune IgM in a “reverse” ELISA (IgM-coated plates)**

Binding of recombinant PfEMP1 domains to immobilized non-immune IgM. Means and standard deviations of data from three independent experiments are shown. Dotted lines represent the cut-off above which binding to non-immune IgM was considered as positive.

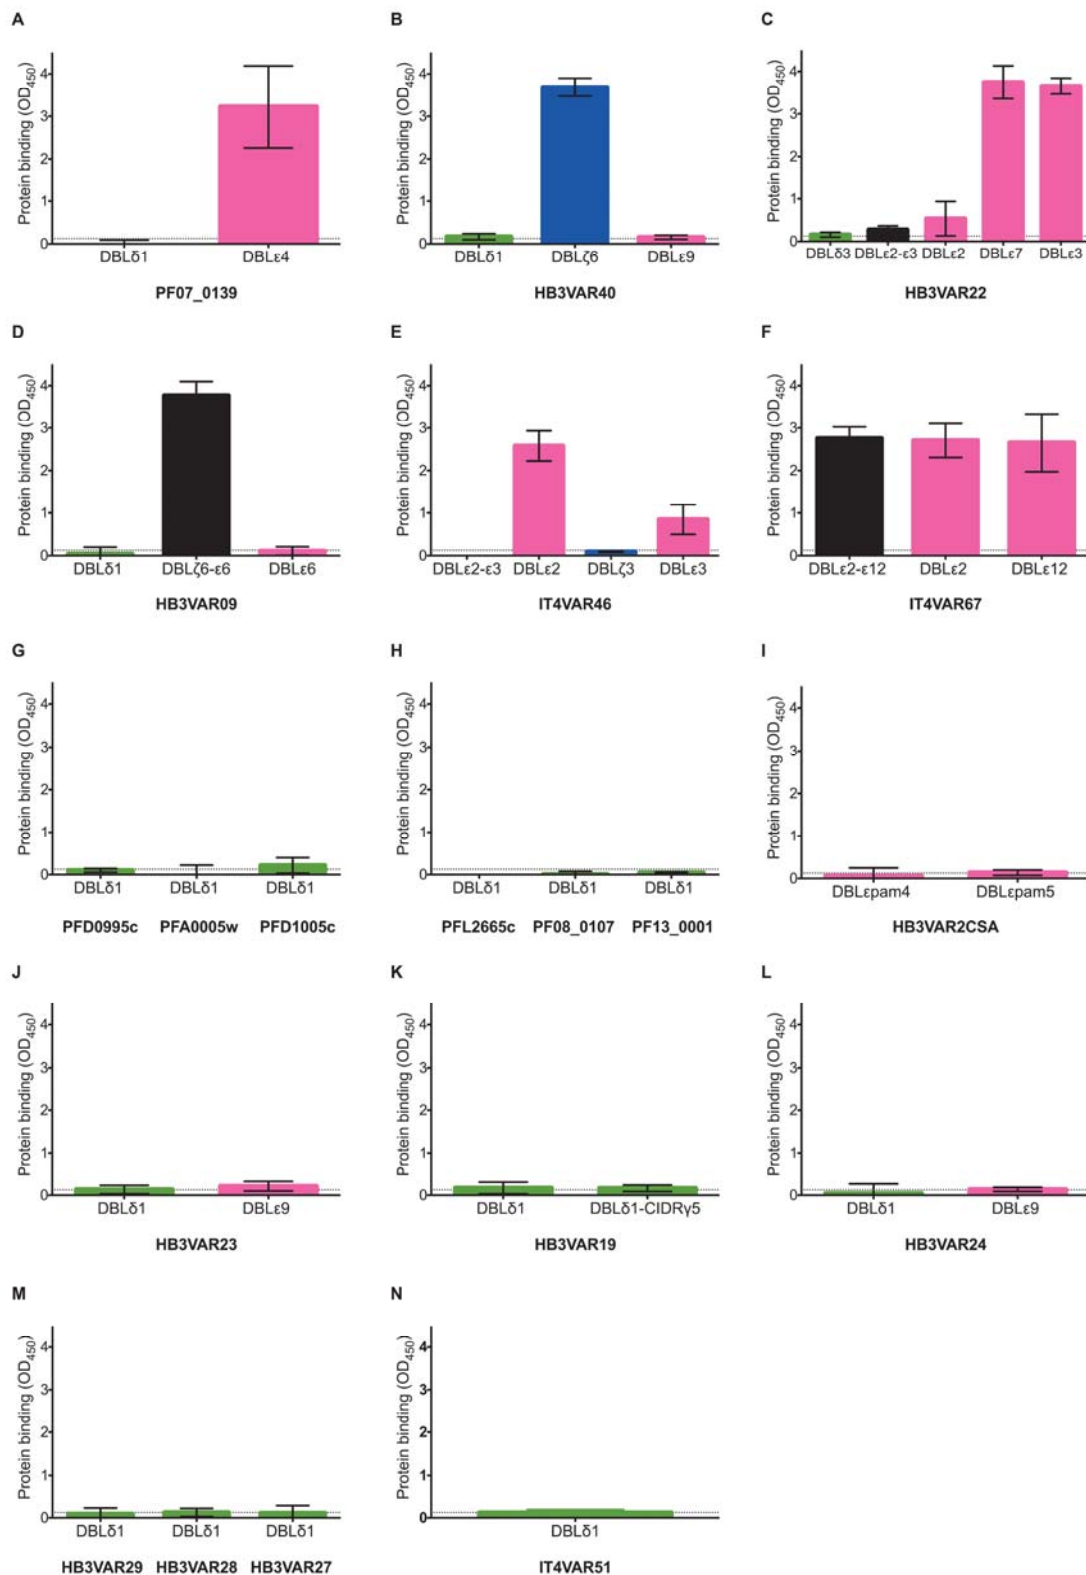

**Figure S5. Non-immune IgM-binding to recombinant PfEMP1 domains on BioPlex beads**

Non-immune IgM-binding to recombinant domains from PfEMP1 proteins previously (A) or not previously (B) shown to bind IgM. Data shown are the mean fluorescence intensity (MFI) for each recombinant PfEMP1 construct minus the MFI of the control construct measured in the same well. P-value calculated by t-test relative to control construct. Each experiment was repeated at least three times with quantitatively similar results. Mean and standard deviations of representative experiments are shown. Color-coding as in Fig. 2B. \* P < 0.05, \*\* P < 0.01, \*\*\* P < 0.001. The domain structures of the PfEMP1 variants involved are also shown (C).

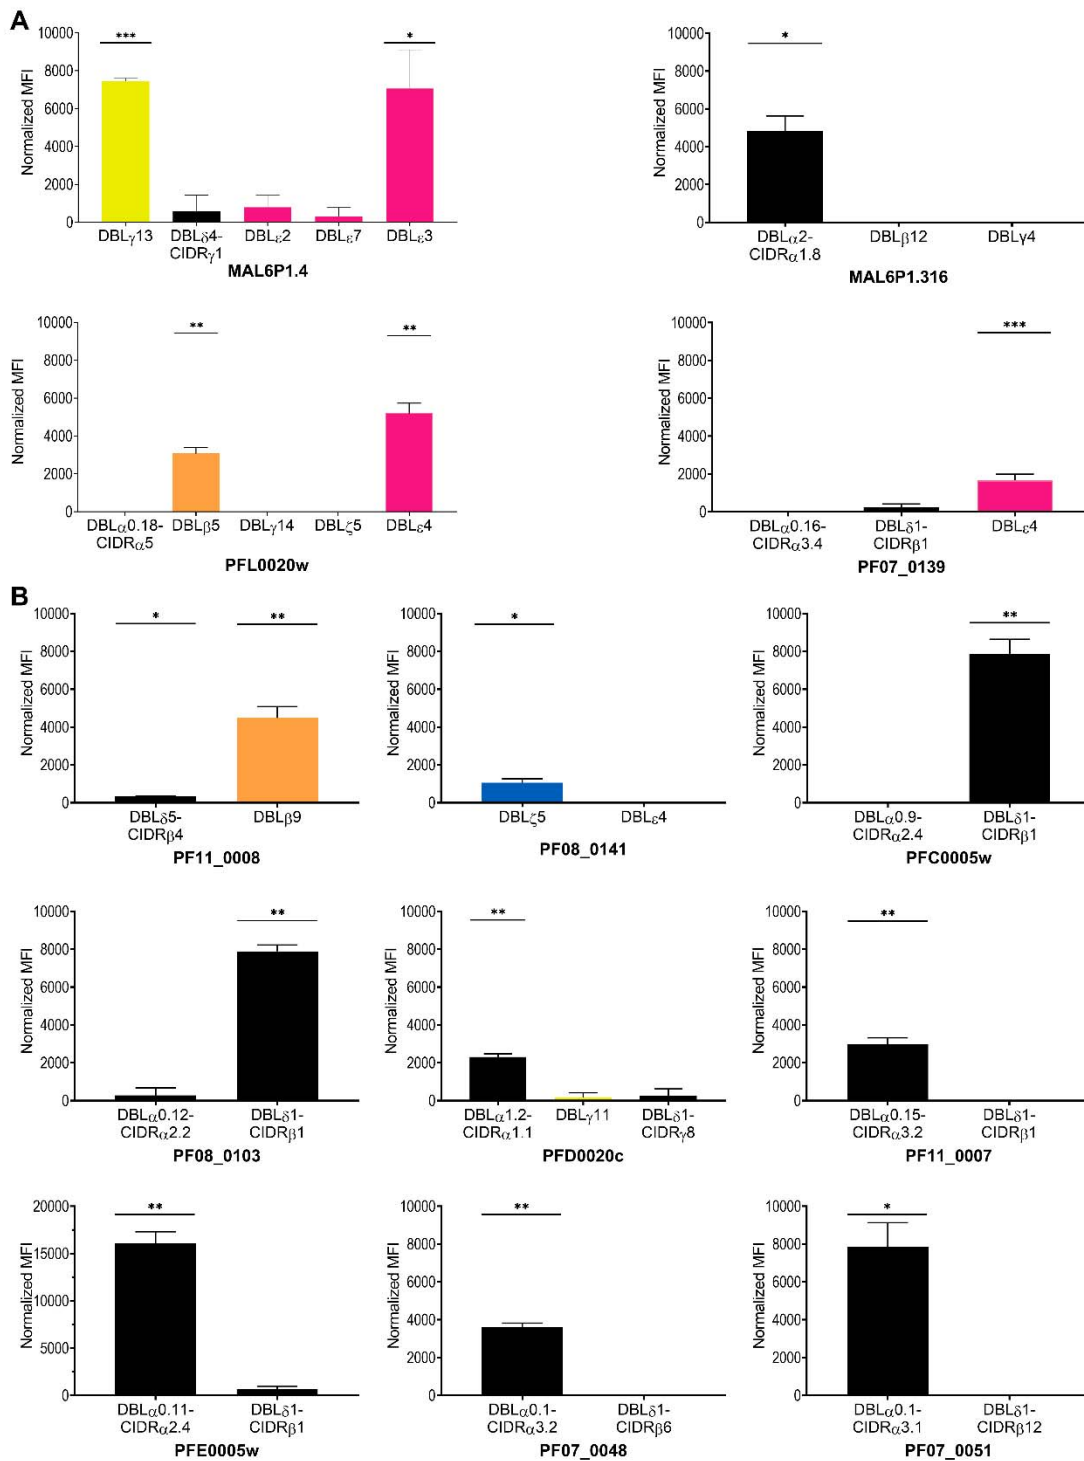

**C**

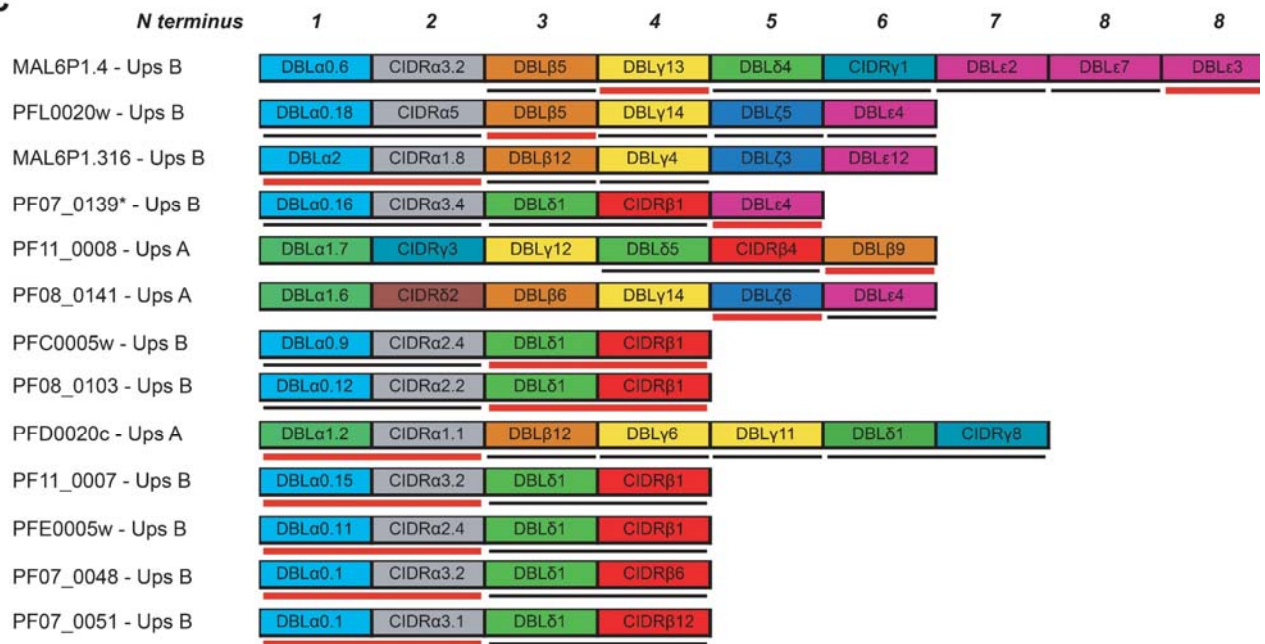



**Figure S6. Non-immune IgM-binding and specific PfEMP1 expression on the surface of erythrocytes infected by *P. falciparum* sub-clones**

Data presented as in Fig. 5.

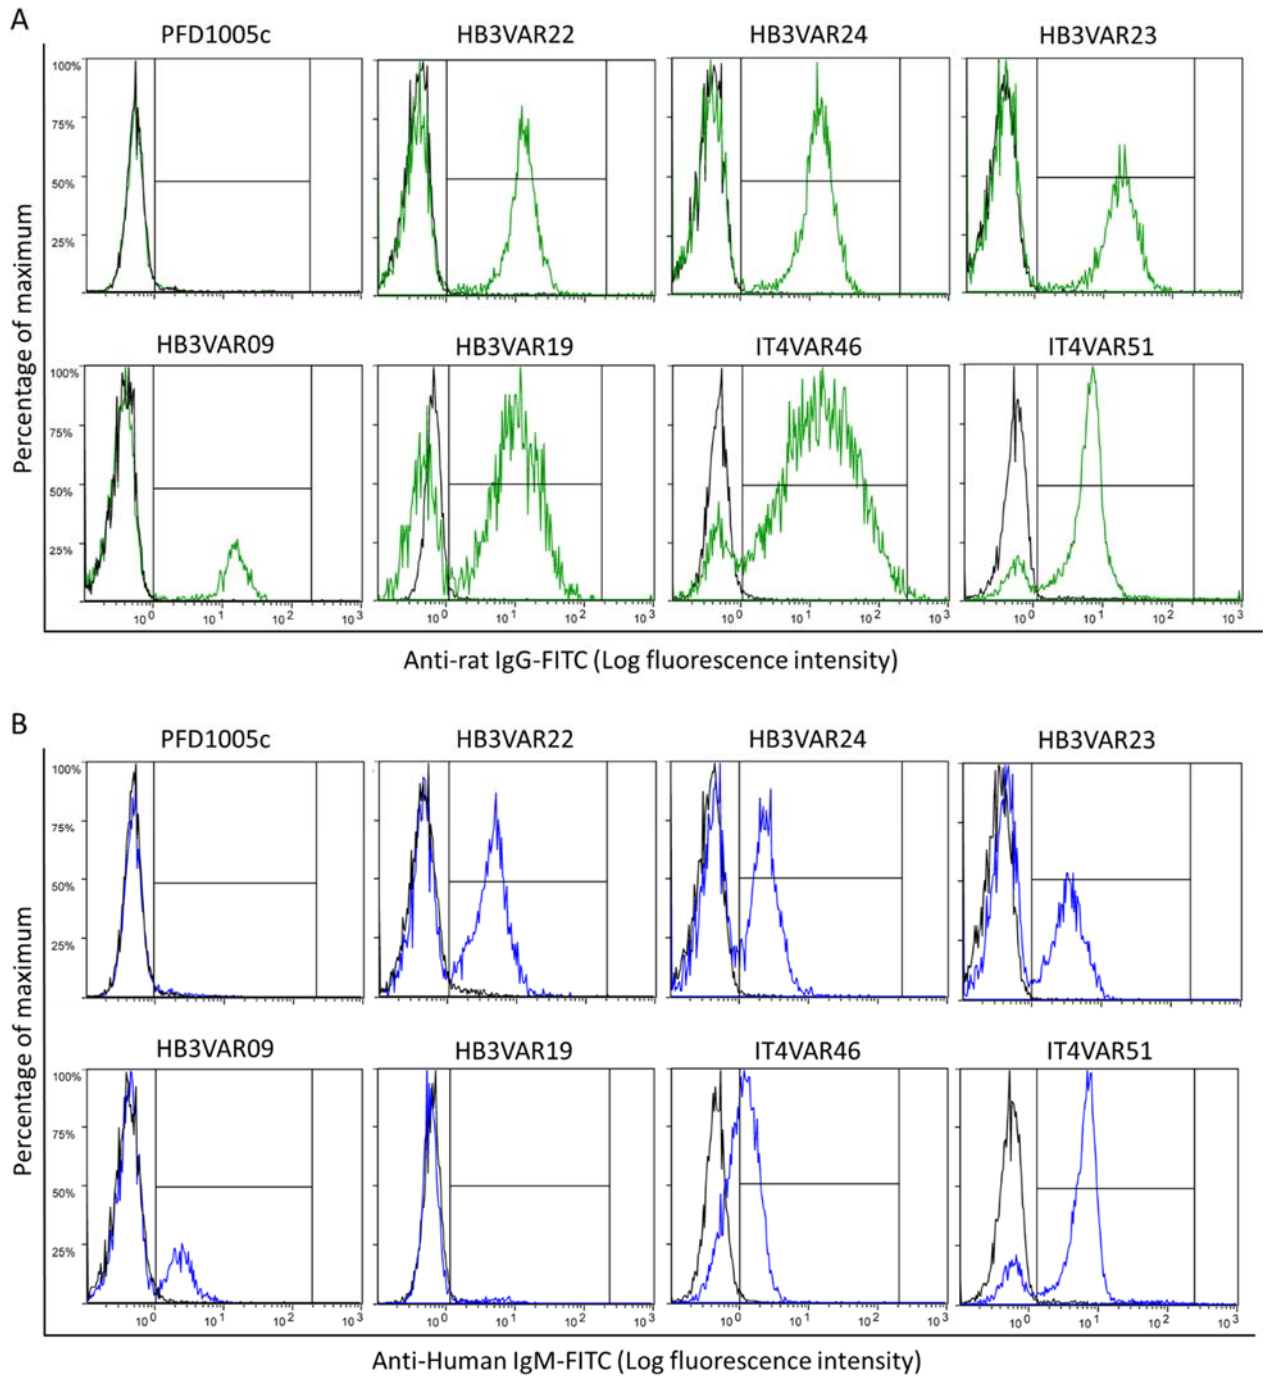



**Fig. S7. Non-immune IgM-binding and specific PfEMP1 expression on the surface of infected erythrocytes selected by rat anti-PfEMP1 domain-specific IgG**

Data presented as in Fig. 6.

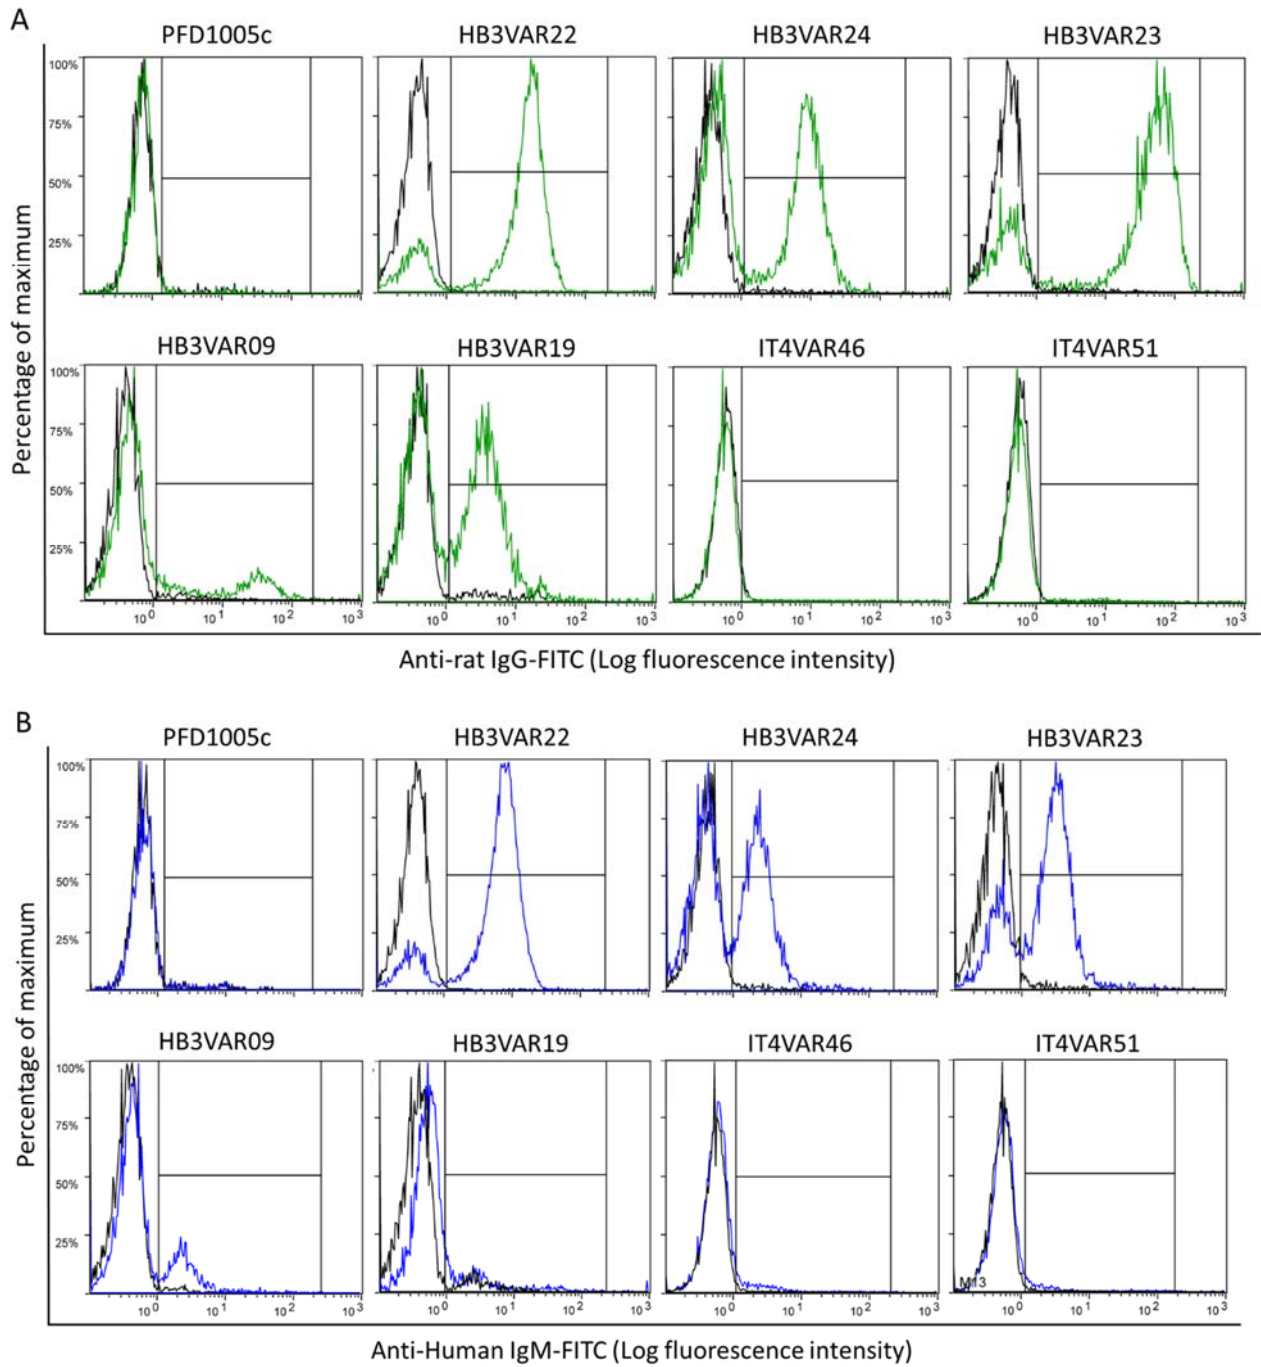

**Figure S8. Recombinant protein expression and purification**

Coomassie-stained gels (top) and corresponding anti-His immunoblots (bottom) of recombinant proteins from *P. falciparum* 3D7 (A), IT4 (B), and HB3 (C). Arrows indicate the expected size for each construct under reducing conditions (+DTT).

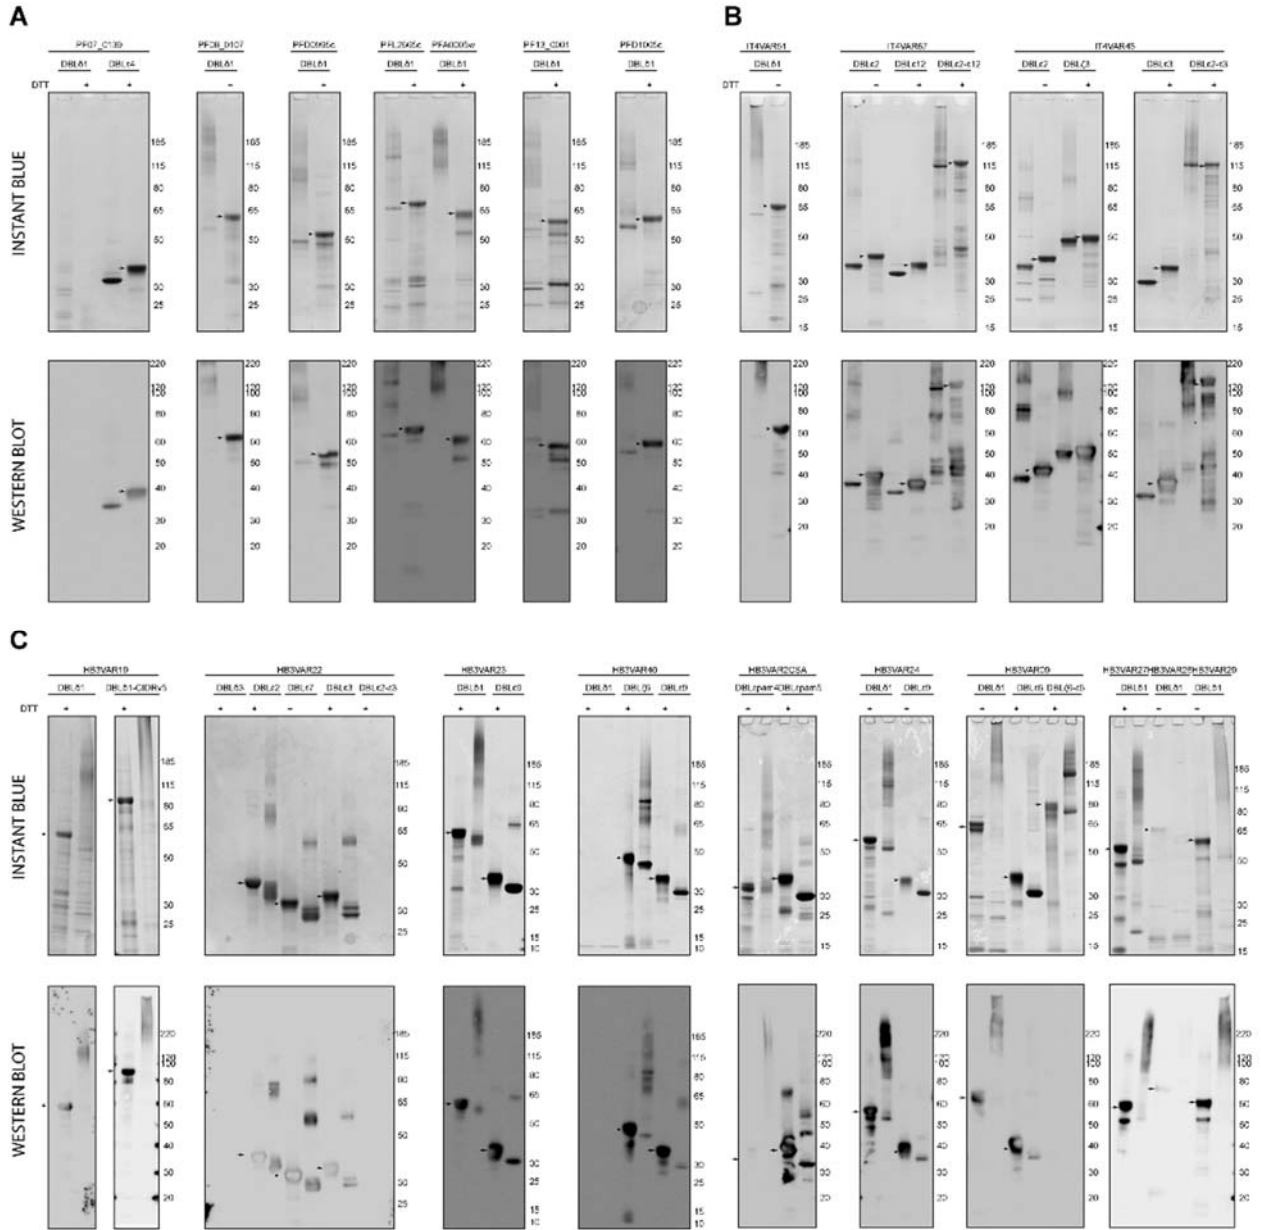

**Table S1. var gene transcription in 3D7 sub-clones, sorted according to IE reactivity with non-immune IgM**

| IgM <sup>+</sup> IEs | Sub-clone name  | Dominant transcripts |             |                   |      |                   |      |
|----------------------|-----------------|----------------------|-------------|-------------------|------|-------------------|------|
|                      |                 | Primary (%)          |             | Secondary (%)     |      | Tertiary (%)      |      |
| 79%                  | <b>3D7 2.28</b> | <i>pfl0030c</i>      | <b>(86)</b> | <i>pf1000c</i>    | (2)  | <i>pf1005c</i>    | (2)  |
| 63%                  | <b>3D7 3.17</b> | <i>pfl0030c</i>      | <b>(61)</b> | <i>pf1005c</i>    | (6)  | <i>pf1000c</i>    | (4)  |
| 34%                  | 3D7 3.82        | <i>pfl0020w</i>      | (27)        | <i>pfl1955w</i>   | (16) | <i>pfl2665c</i>   | (16) |
| 25%                  | 3D7 3.30        | <i>pf1005c</i>       | (15)        | <i>pf10005w</i>   | (9)  | <i>pf1005c</i>    | (9)  |
| 24%                  | 3D7 4.63        | <i>pf1005c</i>       | (14)        | <i>pf1000c</i>    | (9)  | <i>pf1015c</i>    | (7)  |
| 23%                  | 3D7 4.34        | <i>pf1005c</i>       | (14)        | <i>pf1000c</i>    | (10) | <i>mal6p1.316</i> | (5)  |
| 19%                  | <b>3D7 2.72</b> | <i>pfl2665c</i>      | <b>(63)</b> | <i>pf1005c</i>    | (4)  | <i>pf1000c</i>    | (4)  |
| 19%                  | 3D7 3.75        | <i>pf1000c</i>       | (30)        | <i>pf1005c</i>    | (22) | <i>pfl0030c</i>   | (5)  |
| 13%                  | 3D7 2.27        | <i>pf1000c</i>       | (18)        | <i>pf1005c</i>    | (13) | <i>pf1015c</i>    | (8)  |
| 12%                  | 3D7 1.67        | <i>pfa0005w</i>      | (34)        | <i>mal6p1.316</i> | (8)  | <i>pf1005c</i>    | (7)  |
| 10%                  | <b>3D7 3.50</b> | <i>pf08_0107</i>     | <b>(36)</b> | <i>pf1005c</i>    | (8)  | <i>pf10005w</i>   | (4)  |
| 8%                   | 3D7 4.59        | <i>pf1005c</i>       | (19)        | <i>pf1000c</i>    | (11) | <i>mal6p1.316</i> | (5)  |
| 8%                   | 3D7 1.14        | <i>pfl0030c</i>      | (13)        | <i>pf1005c</i>    | (11) | <i>pf1000c</i>    | (10) |
| 7%                   | 3D7 2.68        | <i>pf1005c</i>       | (13)        | <i>pf1000c</i>    | (10) | <i>pfe0005w</i>   | (5)  |
| 6%                   | 3D7 4.58        | <i>pf1005c</i>       | (22)        | <i>pf1000c</i>    | (8)  | <i>pf08_0107</i>  | (7)  |
| 6%                   | 3D7 4.26        | <i>pf1015c</i>       | (16)        | <i>pf1005c</i>    | (10) | <i>pfl0020w</i>   | (10) |
| 6%                   | 3D7 4.80        | <i>pf1005c</i>       | (14)        | <i>mal6p1.316</i> | (12) | <i>pf1000c</i>    | (6)  |
| 5%                   | 3D7 3.11        | <i>pf1000c</i>       | (33)        | <i>pf1005c</i>    | (23) | <i>pf100625c</i>  | (4)  |
| 5%                   | 3D7 3.29        | <i>pf1005c</i>       | (14)        | <i>pf1000c</i>    | (9)  | <i>pf100625c</i>  | (6)  |
| 1%                   | <b>3D7 1.43</b> | <i>pf13_0001</i>     | <b>(43)</b> | <i>mal6p1.1</i>   | (26) | <i>pf100625c</i>  | (8)  |
| 1%                   | 3D7 3.28        | <i>pf1005c</i>       | (14)        | <i>pf1000c</i>    | (9)  | <i>pf100625c</i>  | (6)  |
| 1%                   | 3D7 2.31        | <i>pf100625c</i>     | (9)         | <i>pf1005c</i>    | (9)  | <i>pf1000c</i>    | (9)  |

Sub-clones with dominant ( $\geq 35\%$ ) transcript are indicated in boldface. Selected sub-clones presented in Fig. 2 and S2 are indicated by shading.

**Table S2. var gene transcription in HB3 sub-clones, sorted according to IE reactivity with non-immune IgM**

| IgM <sup>+</sup><br>IEs | Sub-clone<br>name | Dominant transcripts |             |                          |      |                          |      |
|-------------------------|-------------------|----------------------|-------------|--------------------------|------|--------------------------|------|
|                         |                   | Primary (%)          |             | Secondary (%)            |      | Tertiary (%)             |      |
| 72%                     | <b>HB3 2.83</b>   | <i>hb3var2csaA</i>   | <b>(87)</b> | <i>hb3var1csa</i>        | (5)  | <i>hb3var27</i>          | (3)  |
| 64%                     | <b>HB3 1.43</b>   | <i>hb3var39</i>      | <b>(35)</b> | <i>hb3var40</i>          | (23) | <i>hb3var27</i>          | (8)  |
| 60%                     | <b>HB3 1.26</b>   | <i>hb3var40</i>      | <b>(75)</b> | <i>hb3var27</i>          | (7)  | <i>hb3var29</i>          | (3)  |
| 59%                     | <b>HB3 1.83</b>   | <i>hb3var22</i>      | <b>(55)</b> | <i>hb3var27</i>          | (14) | <i>hb3var29</i>          | (4)  |
| 58%                     | <b>HB3 2.6</b>    | <i>hb3var23</i>      | <b>(51)</b> | <i>hb3var27</i>          | (23) | <i>hb3var26</i>          | (3)  |
| 55%                     | <b>HB3 1.12</b>   | <i>hb3var19</i>      | <b>(58)</b> | Unknown                  | (18) | <i>hb3var27</i>          | (8)  |
| 54%                     | HB3 2.11          | <i>hb3var39</i>      | (22)        | <i>hb3var27</i>          | (18) | <i>hb3var40</i>          | (17) |
| 54%                     | HB3 2.41          | <i>hb3var39</i>      | (20)        | <i>hb3var40</i>          | (18) | <i>hb3var27</i>          | (17) |
| 53%                     | HB3 1.61          | <i>hb3var39</i>      | (31)        | <i>hb3var40</i>          | (17) | <i>hb3var27</i>          | (13) |
| 49%                     | HB3 2.17          | <i>hb3var39</i>      | (12)        | <i>hb3var27</i>          | (9)  | <i>hb3var09/hb3var47</i> | (8)  |
| 49%                     | HB3 2.68          | <i>hb3var39</i>      | (22)        | <i>hb3var27</i>          | (17) | <i>hb3var40</i>          | (13) |
| 48%                     | <b>HB3 1.16</b>   | <i>hb3var27</i>      | <b>(38)</b> | <i>hb3var23</i>          | (17) | <i>hb3var25</i>          | (9)  |
| 46%                     | <b>HB3 2.94</b>   | <i>hb3var40</i>      | <b>(45)</b> | <i>hb3var27</i>          | (17) | <i>hb3var29</i>          | (7)  |
| 43%                     | HB3 1.75          | <i>hb3var39</i>      | (20)        | <i>hb3var40</i>          | (16) | <i>hb3var10</i>          | (12) |
| 42%                     | HB3 1.71          | <i>hb3var27</i>      | (24)        | <i>hb3var39</i>          | (16) | <i>hb3var29</i>          | (9)  |
| 41%                     | HB3 2.42          | <i>hb3var39</i>      | (19)        | <i>hb3var24</i>          | (13) | <i>hb3var27</i>          | (13) |
| 40%                     | HB3 1.74          | <i>hb3var27</i>      | (30)        | <i>hb3var39</i>          | (23) | <i>hb3var34</i>          | (6)  |
| 39%                     | <b>HB3 2.62</b>   | <i>hb3var27</i>      | <b>(38)</b> | <i>hb3var39</i>          | (22) | <i>hb3var40</i>          | (8)  |
| 38%                     | HB3 2.19          | <i>hb3var39</i>      | (23)        | <i>hb3var27</i>          | (20) | <i>hb3var29</i>          | (11) |
| 37%                     | HB3 1.40          | <i>hb3var27</i>      | (24)        | <i>hb3var40</i>          | (22) | <i>hb3var22</i>          | (15) |
| 36%                     | HB3 2.5           | <i>hb3var27</i>      | (29)        | <i>hb3var29</i>          | (19) | <i>hb3var22</i>          | (14) |
| 33%                     | HB3 2.18          | <i>hb3var27</i>      | (27)        | <i>hb3var07</i>          | (15) | <i>hb3var23</i>          | (13) |
| 27%                     | <b>HB3 1.37</b>   | <i>hb3var27</i>      | <b>(36)</b> | <i>hb3var23</i>          | (28) | <i>hb3var29</i>          | (11) |
| 26%                     | HB3 2.26          | <i>hb3var27</i>      | (27)        | <i>hb3var39</i>          | (17) | <i>hb3var40</i>          | (9)  |
| 24%                     | <b>HB3 1.25</b>   | <i>hb3var27</i>      | <b>(42)</b> | <i>hb3var39</i>          | (9)  | <i>hb3var40</i>          | (6)  |
| 22%                     | <b>HB3 1.84</b>   | <i>hb3var24</i>      | <b>(54)</b> | <i>hb3var27</i>          | (18) | <i>hb3var25</i>          | (4)  |
| 22%                     | <b>HB3 2.71</b>   | <i>hb3var27</i>      | <b>(55)</b> | <i>hb3var09/hb3var47</i> | (18) | <i>hb3var29</i>          | (9)  |
| 14%                     | HB3 1.24          | <i>hb3var39</i>      | (25)        | <i>hb3var40</i>          | (17) | <i>hb3var29</i>          | (16) |
| 6%                      | <b>HB3 1.54</b>   | <i>hb3var29</i>      | <b>(45)</b> | <i>hb3var27</i>          | (9)  | <i>hb3var08</i>          | (5)  |
| 3%                      | <b>HB3 1.11</b>   | <i>hb3var27</i>      | <b>(62)</b> | <i>hb3var29</i>          | (16) | <i>hb3var24</i>          | (11) |
| 3%                      | <b>HB3 2.27</b>   | <i>hb3var28</i>      | <b>(49)</b> | <i>hb3var27</i>          | (22) | <i>hb3var29</i>          | (12) |

Sub-clones with dominant ( $\geq 35\%$ ) transcript are indicated in boldface. Selected sub-clones presented in Fig. 2 and S2 are indicated by shading.

**Table S3. var gene transcription in IT4 sub-clones, sorted according to IE reactivity with non-immune IgM**

| IgM <sup>+</sup><br>IEs | Sub-clone<br>name | Dominant transcripts |             |                 |      |                    |      |
|-------------------------|-------------------|----------------------|-------------|-----------------|------|--------------------|------|
|                         |                   | Primary (%)          |             | Secondary (%)   |      | Tertiary (%)       |      |
| 82%                     | <b>IT4 7.3</b>    | <i>it4var46</i>      | <b>(62)</b> | <i>it4var51</i> | (27) | <i>it4var65</i>    | (2)  |
| 80%                     | <b>IT4 8.51</b>   | <i>it4var51</i>      | <b>(70)</b> | <i>it4var21</i> | (8)  | <i>it4var59</i>    | (6)  |
| 79%                     | <b>IT4 7.37</b>   | <i>it4var51</i>      | <b>(67)</b> | <i>it4var34</i> | (13) | <i>it4var59</i>    | (4)  |
| 78%                     | <b>IT4 7.72</b>   | <i>it4var46</i>      | <b>(86)</b> | <i>it4var21</i> | (2)  | <i>it4var59/65</i> | (2)  |
| 67%                     | <b>IT4 8.1</b>    | <i>it4var67</i>      | <b>(76)</b> | <i>it4var21</i> | (6)  | <i>it4var59</i>    | (3)  |
| 63%                     | <b>IT4 8.7</b>    | <i>it4var67</i>      | <b>(57)</b> | <i>it4var51</i> | (19) | <i>it4var46</i>    | (5)  |
| 60%                     | <b>IT4 8.3</b>    | <i>it4var67</i>      | <b>(50)</b> | <i>it4var34</i> | (19) | <i>it4var66</i>    | (15) |
| 59%                     | <b>IT4 7.5</b>    | <i>it4var67</i>      | <b>(81)</b> | <i>it4var59</i> | (7)  | <i>it4var21</i>    | (7)  |
| 50%                     | <b>IT4 7.4</b>    | <i>it4var67</i>      | <b>(60)</b> | <i>it4var51</i> | (14) | <i>it4var65</i>    | (5)  |
| 39%                     | <b>IT4 8.5</b>    | <i>it4var51</i>      | <b>(84)</b> | <i>it4var59</i> | (2)  | <i>it4var21</i>    | (2)  |
| 39%                     | <b>IT4 8.34</b>   | <i>it4var46</i>      | <b>(91)</b> | <i>it4var34</i> | (1)  | <i>it4var21</i>    | (1)  |
| 37%                     | IT4 7.38          | <i>it4var21</i>      | (27)        | <i>it4var59</i> | (23) | <i>it4var65</i>    | (20) |
| 15%                     | <b>IT4 8.6</b>    | <i>it4var15</i>      | <b>(75)</b> | <i>it4var67</i> | (5)  | <i>it4var08</i>    | (4)  |

Sub-clones with dominant ( $\geq 35\%$ ) transcript are indicated in boldface. Selected sub-clones presented in Fig. 2 and S2 are indicated by shading.

**Table S4. Recombinant proteins used for rat immunization.**

| <b>PfEMP1 variant</b> | <b>Domain name</b>             | <b>Non-immune IgM binding by ELISA</b> |
|-----------------------|--------------------------------|----------------------------------------|
| HB3VAR09              | DBL $\epsilon$ 6               | -                                      |
| HB3VAR19              | DBL $\delta$ 1-CIDR $\gamma$ 5 | -                                      |
| HB3VAR22              | DBL $\epsilon$ 7               | +                                      |
|                       | DBL $\epsilon$ 3               | +                                      |
| HB3VAR23              | DBL $\epsilon$ 9               | -                                      |
| HB3VAR24              | DBL $\epsilon$ 9               | -                                      |
| HB3VAR40              | DBL $\zeta$ 6                  | +                                      |
| PFD1005c              | DBL $\delta$ 1                 | -                                      |
| PF07_0139             | DBL $\epsilon$ 4               | +                                      |
| IT4VAR46              | DBL $\epsilon$ 3               | +                                      |
| IT4VAR51              | DBL $\delta$ 1                 | -                                      |
| IT4VAR67              | DBL $\epsilon$ 2               | +                                      |

**Table S5. List of primers used to clone various PfEMP1 domains for recombinant protein expression**

|    | <b>Construct Name*</b>           | <b>Cloning Primers</b>                                                               | <b>Domain size (aa)</b> |
|----|----------------------------------|--------------------------------------------------------------------------------------|-------------------------|
| 1  | PFD0995c DBL $\delta$ 1          | ATGGATCCTGCAATATAGTAAAAACACTATTTGAGAGC<br>CTAGCTAGCTTAACATGTTTTACAATACGTTGAAAGAGAA   | 446                     |
| 2  | PFA0005w DBL $\delta$ 1          | CTAGCTAGCTGCAATATAGTGAACAATGTGTTTACAG<br>CTACTCGAGTTAACATGGAGCACAATAATTTTCATGT       | 508                     |
| 3  | PFD1005c DBL $\delta$ 1          | ATGGATCCTGCAATATAGTAAAAACACTATTTGAGAGC<br>CTAGCTAGCTTAACATGTTTTACAATACGTTGAACGAG     | 496                     |
| 4  | PFL2665c DBL $\delta$ 1          | ATGGATCCTGCGAAACAGTGGCCACAG<br>CTAGCTAGCTTAACATGGTTTACAATTATCTGCATGTTT               | 563                     |
| 5  | PF08_0107 DBL $\delta$ 1         | ATGGATCCTGTGAAATAGTACAAAACTATTTACTAATGG<br>CTAGCTAGCTTAACACGCTTTACAATACGTTGAACG      | 519                     |
| 6  | PF13_0001 DBL $\delta$ 1         | CTAGCTAGCTGCAAAACGGTGGCCG<br>CTACTCGAGTTAACATGGATCACAATATTTTGCGT                     | 482                     |
| 7  | PF07_0139 DBL $\delta$ 1         | GCGGATCCTGCAAAACGGTGGCAGAA<br>CTAGCTAGCTTAACATGGATCACAATATTTTTTATGTCC                | 487                     |
| 8  | PF07_0139 DBL1 $\epsilon$ 4      | GCGGATCCATATTTAAAACATGTCCTTATGATAATGATAC<br>CTAGCTAGCTTAGCACTCACATTTACTTTTCAGATTTTTA | 322                     |
| 9  | HB3VAR2CSA DBL $\epsilon$ pam_D4 | ATGGATCCGAACAAGTAAAATATTACAAATATAATAATGCTG<br>CTAGCTAGCTTATTCCGATTCTTTGTTACTTTTACGG  | 312                     |
| 10 | HB3VAR2CSA DBL $\epsilon$ pam_D5 | ATGGATCCCATTAGATAGATGCTTTGACGACA<br>CTAGCTAGCTTAACACGGACATTTAGAACAATGTTCC            | 302                     |
| 11 | HB3VAR40 DBL $\delta$ 1          | ATGGATCCTGTGAAATAGTTGACGAGCTATTTAAAG<br>CTAGCTAGCTTAACACGCTTTACAATACGTTGAAGG         | 475                     |
| 12 | HB3VAR40 DBL $\zeta$ 6           | CTAGCTAGCTGTGTTGAAAGAGCGGCAAAAC<br>CTACTCGAGTTAACATTCACATGCTCTTTCATATTCTTT           | 417                     |
| 13 | HB3VAR40 DBL $\epsilon$ 9        | ATGGATCCCATTGGATCAATGTCCTCATACT<br>CTACTCGAGTTAACATTCACATTTTCTTTATTTTAGTATCG         | 321                     |
| 14 | HB3VAR22 DBL $\delta$ 3          | ATGGATCCTGCAACACAGTGAAAACCGC<br>CTAGCTAGCTTAACATGTTTTGCAATATTCTGAAGAAC               | 465                     |



|    |                                            |                                                                                         |     |
|----|--------------------------------------------|-----------------------------------------------------------------------------------------|-----|
| 15 | HB3VAR22 DBL $\epsilon$ 2                  | ATGGATCCCCGAAAATATTGTGTGGTATTACTAAAAC<br>CTAGCTAGCTTAACATTCACATTCATCTTTAACATCATCA       | 348 |
| 16 | HB3VAR22 DBL $\epsilon$ 7                  | ATGGATCCGACCTAGATAAATGTCCAAGTGAAGAA<br>CTAGCTAGCTTAACATTGACATTCAGAACATTTTCTTT           | 275 |
| 17 | HB3VAR22 DBL $\epsilon$ 3                  | ATGGATCCCCTTATCTTCGTTGTCCTGATTCAAATTATGT<br>CTAGCTAGCTTAGCAATCACATTTATCTTTATATGTAGGCT   | 303 |
| 18 | HB3VAR22 DBL $\epsilon$ 2-DBL $\epsilon$ 3 | ATGGATCCCCGAAAATATTGTGTGGTATTACTAAAAC<br>CTAGCTAGCTTAGCAATCACATTTATCTTTATATGTAGGCT      | 979 |
| 19 | HB3VAR23 DBL $\delta$ 1                    | ATGGATCCTGTGACATAGTAAACACACTATTTAGTGACAC<br>CTAGCTAGCTTAACATGCTTTACAATACGTTGAAGGAG      | 476 |
| 20 | HB3VAR23 DBL $\epsilon$ 9                  | ATGGATCCCCATTGGATAAATGCCCTAATACT<br>CTAGCTAGCTTAACAGTTACATTTATTTTTCAGGTTGTTATC          | 321 |
| 21 | HB3VAR19 DBL $\delta$ 1                    | ATGGATCCTGCAGTATAGTGGCTGACATATTTAAA<br>CTAGCTAGCTTAACAGGTTTCGCAATATTTTGAATG             | 494 |
| 22 | HB3VAR19 DBL $\delta$ 1-CIDR $\gamma$ 5    | ATGGATCCTGCAGTATAGTGGCTGACATATTTAAA<br>CTAGCTAGCTTAACACGTTTGTGCTTGGTTATCG               | 769 |
| 23 | HB3VAR24 DBL $\delta$ 1                    | ATGGATCCTGCGACACAGTGAAAAGCGC<br>CTAGCTAGCTTAACACGTTTTACAATATTCTAAAGGACCA                | 453 |
| 24 | HB3VAR24 DBL $\epsilon$ 9                  | ATGGATCCCCATTGGATCAATGTCCTCATACA<br>CTAGCTAGCTTAACAGTTACATTTATTTTTCAGGTTGTTATC          | 322 |
| 25 | HB3VAR09 DBL $\delta$ 1                    | ATGGATCCTGTGACATAGTAAAAGAAGTATTTAAAGACAC<br>CTAGCTAGCTTAACACGTTTTACAATAATCTAAGGGGC      | 531 |
| 26 | HB3VAR09 DBL $\zeta$ 6                     | CTAGCTAGCTGTGTTGAGAGAATAGCAAAGAATTAA<br>CTACTCGAGTTAACATTCACATACTTTTTCATATTCTTTTG       | 424 |
| 27 | HB3VAR09 DBL $\epsilon$ 6                  | CTAGCTAGCCCATTAGATAATTGTCCTAAGGATAATAAAC<br>CTACTCGAGTTAACAAACACATATATTTTAAACATCACTATCG | 319 |
| 28 | HB3VAR29 DBL $\delta$ 1                    | ATGGATCCTGCGAAACAGTGAAAAAAGCAC<br>CTAGCTAGCTTAACATGGATCACAAAGATTTGTATGTTT               | 490 |
| 29 | HB3VAR28 DBL $\delta$ 1                    | ATGGATCCTGCCAATAGTAAAAACCGCACTT<br>CTAGCTAGCTTAACATGGATCACAAATGTTTTGTATGTTT             | 539 |
| 30 | HB3VAR27 DBL $\delta$ 1                    | GCGGATCCTGTGAAATAGTACAAACACTATTTACTAGTGG                                                | 473 |

|    |                                             |                                                                                                  |      |
|----|---------------------------------------------|--------------------------------------------------------------------------------------------------|------|
|    |                                             | <b>CTAGCTAGCTTAACATGGATTACAATCTTTTGCATGT</b>                                                     |      |
| 31 | IT4VAR46 DBL $\epsilon$ 2                   | <b>GCGCTAGCTCGGATATATTTTGTGATCGTAACAA</b><br><b>CTACTCGAGTTAACACGTACACAAATTTTACTTCAT</b>         | 347  |
| 32 | IT4VAR46 DBL $\zeta$ 3                      | <b>GCGCTAGCTGTATAGAGAAAGCTGCATATGAACTACA</b><br><b>CTACTCGAGTTAACACTTGCATTTTCTTTGTATACTTTAG</b>  | 431  |
| 33 | IT4VAR46 DBL $\epsilon$ 3                   | <b>GCGCTAGCCCATTAGATAAATGTCCTGATCAAATAC</b><br><b>CTACTCGAGTTAGCAATTACATTTACCTTTAAGTGCTTTAT</b>  | 309  |
| 34 | IT4VAR46 DBL $\epsilon$ 2-DBL $\epsilon$ 3  | <b>GCGCTAGCTCGGATATATTTTGTGATCGTAACAA</b><br><b>CTACTCGAGTTAGCAATTACATTTACCTTTAAGTGCTTTAT</b>    | 1104 |
| 35 | IT4VAR51 DBL $\delta$ 1                     | <b>GCGCTAGCTGTGACATAGTGGCAACACTATTTGA</b><br><b>CTACTCGAGTTAACACGTTTTACAATACGTTGAACGA</b>        | 588  |
| 36 | IT4VAR67 DBL $\epsilon$ 2                   | <b>ATGGATCCTCGGATAGGTTGTGTGATGATAAGA</b><br><b>CTAGCTAGCTTAACACGTACACAACATTTTACTTCAT</b>         | 345  |
| 37 | IT4VAR67 DBL $\epsilon$ 12                  | <b>ATGGATCCCCATTAGATGATTGTCCCGACG</b><br><b>CTCGCTAGCTTAACAAATATATTTTAATATTTCTTTATATGCGAC</b>    | 325  |
| 38 | IT4VAR67 DBL $\epsilon$ 2-DBL $\epsilon$ 12 | <b>ATGGATCCTCGGATAGGTTGTGTGATGATAAGA</b><br><b>CTCGCTAGCTTAACAAATATATTTTAATATTTCTTTATATGCGAC</b> | 1129 |

Sequences recognized by the restriction enzymes used for cloning are presented in bold. A stop codon was included in the reverse primer. The enzymes BamHI (GGATCC), NheI (GCTAGC) or XhoI (CTCGAG) were used. \*Names, sequences and domain boundaries as reported in the VarDom 1.0 server. (<http://www.cbs.dtu.dk/services/VarDom/>)

**Table S6. PfEMP1 constructs from *P. falciparum* 3D7 cloned into pHisAdEx vector\***

| <b>PfEMP1</b> | <b>Construct name</b>                                   | <b>Cloning primers</b>                                                                 | <b>Domain size (aa)</b> |
|---------------|---------------------------------------------------------|----------------------------------------------------------------------------------------|-------------------------|
| 1             | PFD0020c DBL $\alpha$ 1.2 -CIDR $\alpha$ 1.1 (AA 2-745) | F: CCCGGATCCAGGGGACAGGTTTCATCAACTCCTTCGG<br>R: CCCTCCGGAGCCACCATTATTGTTTGTTCACA        | 743                     |
| 2             | DBL $\beta$ 12 (AA 736-1192)                            | F: CCCGGATCCAGAACCCCTGTGGAACAAACAATAATGG<br>R: CCCGAATTCCTGGTTTTTGTGCCTTCTGCCTAG       | 456                     |
| 3             | DBL $\gamma$ 6 (AA 1211-1536)                           | F: CCCGGATCCAGGGCGGAACAGGTGGAATAGATGG<br>R: CCCGAATTCCTCGGAGTTATTTTTCACTTTTTCC         | 325                     |
| 4             | DBL $\gamma$ 11 (AA 1583-1901)                          | F: CCCGGATCCAGAGCGCAACTGATTATATAGAAAAG<br>R: CCCGAATTCCTTATACTCACAATTTGCACTAGTA        | 318                     |
| 5             | DBL $\delta$ 1-CIDR $\gamma$ 8 (AA 2119-2894)           | F: CCCGGATCCAGAAATATGGCGGAAACAACACTCACGTTT<br>R: CCCGAATTCCTGCTGGGTTTTGGGCACTAAGTA     | 775                     |
| 6             | PF08_0141 DBL $\zeta$ 5 (AA 1700-2077)                  | F: CCCGGATCCAGCCTTCTATTGAAGAATGTGATATCAA<br>R: CCCGAATTCATCCAATGGATCAAAATCTTTCGCAC     | 377                     |
| 7             | DBL $\epsilon$ 4 (AA 2080-2387)                         | F: CCCGGATCCAGCCTGTTGATAATAACGAATGTAAGAAG<br>R: CCCTCTAGAAGGTGAATCTTTTTTTTTTTCTTTTTCCG | 307                     |
| 8             | PFL0020w DBL $\alpha$ 0.18 CIDR $\alpha$ 5 (AA 2-731)   | F: CCCCCTTAAGACATCATGTAGTCCGGAGAATAC                                                   | 279                     |

|       |                                               |                                                   |     |
|-------|-----------------------------------------------|---------------------------------------------------|-----|
|       |                                               | R: CCCGAATTCCCTCTTTGGAGCAATTTTTTTCTTCTCG          |     |
| 9     | DBL $\beta$ 5_D4 (AA 750-1242)                | F: CCCGGATCCAGAATCCGTGTAGCGCCCAACCTGG             | 492 |
|       |                                               | R: CCCGAATTCCC GCATCTTTTTTTCTTCTTCCTTC            |     |
| 10    | DBL $\gamma$ 14 (AA 1255-1592)                | F: CCCGGATCCAGGCAACAGATCCTATAGATGGGTG             | 337 |
|       |                                               | R: CCCGAATTCCCTGGTTGTCTCGACGCATTTTCC              |     |
| 11    | DBL $\zeta$ 5 (AA 1698-2041)                  | F: CCCGGATCCAGGCAAATAATTTATTGGACACATCTTG          | 343 |
|       |                                               | R: CCCGAATTCCATCAGTTTTAACAAATTTAAATCTTCGAC        |     |
| 12    | DBL $\epsilon$ 4 (AA 2073-2382)               | F: CCCGGATCCAGCCTGTTGACAAGGACGAATGC               | 309 |
|       |                                               | R: CCCGAATTCCCTCCATTCCC ACTTTTATCGTATTTTTC        |     |
| <hr/> |                                               |                                                   |     |
| 13    | MAL6P1.4 DBL $\beta$ 5 (AA 830-1309)          | F: CCCGGATCCAGAGTAATCCATGTGCTACTCCTAG             | 479 |
|       |                                               | R: CCTCTAGACGGAGGCACTTGTGGCCTAC                   |     |
| 14    | DBL $\gamma$ 13 (AA 1328-1660)                | F: CCCGGATCCAGGGTAAGGATGGTGAAACAACAGAAA           | 332 |
|       |                                               | R: CCCGAATTCCACTAG AATCTTCATTATGTTGTTGTG          |     |
| 15    | DBL $\delta$ 4-CIDR $\gamma$ 1 (AA 1710-2388) | F: CCCGGATCCAGACTGAAGCTTGTTCAACAAAATATAAAAAT      | 678 |
|       |                                               | R: CCCGAATTCCAGAGGTTTCTTCTTCGTC ACTATG            |     |
| 16    | DBL $\epsilon$ 2 (AA 2413-2774)               | F: CCCGGATCCAGCCCAAACAGATTCCGATATTTTG             | 361 |
|       |                                               | R: CCCGAATTCCATCATTAACTTTATCGTCATGTGC             |     |
| 17    | DBL $\epsilon$ 7 (AA 2785-3063)               | F: CCCGGATCCAGAATAAAAATATATGTAATAAATATAAAAAACGACG | 278 |
|       |                                               | R: CCCGAATTCCCTCTATATCTTTAAACTACATATAC            |     |

|    |                                                          |                                                                                           |     |
|----|----------------------------------------------------------|-------------------------------------------------------------------------------------------|-----|
| 18 | DBL $\epsilon$ 3 (AA 3105-3410)                          | F: CCCGGATCCAGCCTGAAGACATTGAATGTAGTCAA<br>R: CCCTCTAGAAGGTGTTGTGGGAATCATTTTTTTG           | 305 |
| 19 | MAL6P1.316 DBL $\alpha$ 2-CIDR $\alpha$ 1.8 (AA 2-726)#  | F: CCCCTCCGGAGCGCCGCAACGTGCCGAAGATTC<br>R: CCCGAATTCCACCACGAGTGGGTATACGAGTGCG             | 724 |
| 20 | DBL $\beta$ 12 (AA 703-1204)                             | F: CCCGGATCCAGGAAGAAGATGAAAATTGCCCC<br>R: CCCGAATTCCACCTCCAGTGGGTTTTGGTGG                 | 501 |
| 21 | DBL $\gamma$ 4 (AA 1265-1603)                            | F: CCCGGATCCAGTCAAATGGTGGAAAAAATGGAATAAATGG<br>R: CCCTCTAGATGGTTGTCTCGACGCATTTTCCATG      | 338 |
| 22 | PF07_0139 DBL $\alpha$ 0.16-CIDR $\alpha$ 3.4 (AA 2-918) | F: CCCGGATCCAGGCGAGGCCATCAGGTAGTGCTGG<br>R: CCCTCTAGAGGCGTCAGTAAGACTGGTTTTGAG             | 916 |
| 23 | DBL $\delta$ 1-CIDR $\beta$ 1 (AA 910-1688)              | F: CCCGGATCCAGGCACTCAAACCAGTCTTACTGAC<br>R: CCCGAATTCCTTCACTTTCTGGAACTTTCGATTTTTCC        | 778 |
| 24 | DBL $\epsilon$ 4 (AA 1722-2011)                          | F: CCCGGATCCAGTATCGAAATAAAAATAACATTGGATGTCC<br>R: CCCGAATTCCTTTATCGTCGTCAATAAAAATTTTGAACG | 289 |
| 25 | PF11_0008 DBL $\delta$ 5-CIDR $\beta$ 4 (AA 1236-1874)   | F: CCCGGATCCAGAAATATGGGAAGATGCCACTAGGTTT<br>R: CCCGAATTCATTTTTTACAATGACGTATTTTCAATTTTAAAG | 638 |
| 26 | CIDR $\beta$ 4 (AA 1922-2420)                            | F: CCCGGATCCAGAATCCATGTGGCGACAAAAGCGCC<br>R: CCCTCTAGATGCCGGCTCCTCCTCCTCTTCGGC            | 498 |
| 27 | PFC0005w DBL $\alpha$ 0.9-CIDR $\alpha$ 2.4 (AA 2-854)   | F: CCCGGATCCAGGTTAGGACATTAGATCCTGAGG                                                      | 852 |

|    |                                                           |                                         |     |
|----|-----------------------------------------------------------|-----------------------------------------|-----|
|    |                                                           | R: CCCTCTAGAAGCAGTGTTGTCGCCATTAG        |     |
| 28 | DBL $\delta$ 1-CIDR $\beta$ 1 (AA 848-1685)               | F: CCCCTTAAGACTAATGGCGACAACACTGCTC      | 837 |
|    |                                                           | R: CCCTCTAGATTCCCTCGGATCGACTATCTTCC     |     |
| 29 | PF08_0103 DBL $\alpha$ 0.12-CIDR $\alpha$ 2.2 (AA 2-815)# | F: CCCGGATCCAGTCGACGCTAGGAGGTGGTACTGAC  | 813 |
|    |                                                           | R: CCCGAATTCCGGCGGCATTCAAGTCGCCTTTGG    |     |
| 30 | DBL $\delta$ 1-CIDR $\beta$ 1 (AA 810-1616)               | F: CCCCTTAAGGGCGACTTGAATGCCGCCTGCAC     | 806 |
|    |                                                           | R: CCCGAATTCCTGATGCCGGTGTACAAGTTTCTCC   |     |
| 31 | PF11_0007 DBL $\alpha$ 0.15-CIDR $\alpha$ 3.2 (AA 2-844)  | F: CCCGGATCCAGGAGCCGCATGGAGGTAGCGG      | 842 |
|    |                                                           | R: CCCGAATTCCTTCCTCCTCCTCCTCCTGCTCTTC   |     |
| 32 | DBL $\delta$ 1-CIDR $\beta$ 1 (AA 908-1700)               | F: CCCGGATCCAGAAATACGGTCCAAAGGCACCCAC   | 792 |
|    |                                                           | R: CCCGAATTCGCCTTTTTCTCCTGCTTTTGGTTC    |     |
| 33 | PFE0005w DBL $\alpha$ 0.11-CIDR $\alpha$ 2.4 (AA 2-793)   | F: CCCGGATCCAGGGGCCGCCAGGTATTACTGGTAC   | 791 |
|    |                                                           | R: CCCGAATTCCTTCTTCCTTTTCTCAGTGGCC      |     |
| 34 | DBL $\delta$ 1-CIDR $\beta$ 1 (AA 862-1706)               | F: CCCCTTAAGGACAATCTGAAAGAAGCCTGCAC     | 844 |
|    |                                                           | R: CCCGAATTCCTCCTTTGTCTTTTCTCCTCCTTG    |     |
| 35 | PF07_0048 DBL $\alpha$ 0.1-CIDR $\alpha$ 3.2 (AA 2-901)   | F: CCCGGATCCAGGCGAGGCCAGGTAGCGGTGGTGG   | 899 |
|    |                                                           | R: CCCGAATTCCTGGGTTCTGAAAGAGTTTAGACAC   |     |
| 36 | DBL $\delta$ 1-CIDR $\beta$ 6 (AA 901-1679)               | F: CCCGGATCCAGCCAAACAATTTTTCCGACGCTTGTA | 778 |

|    |           |                                               |                                                |     |
|----|-----------|-----------------------------------------------|------------------------------------------------|-----|
|    |           |                                               | R: <b>CCCGGCGCCTGCTGCTGCTGGTGTACAAGTCTC</b>    |     |
| 37 | PF07_0051 | DBL $\alpha$ 0.1-CIDR $\alpha$ 3.1 (AA 2-901) | F: <b>CCCGGATCCAGGCGCCAGGAGGTCGTCAGGGTGAT</b>  | 899 |
|    |           |                                               | R: <b>CCCGAATTCCTGCTTGTTCACGATTTTGCAAACGTC</b> |     |
| 38 |           | DBL $\delta$ 1-CIDR $\beta$ 1 (AA 910-1714)   | F: <b>CCCGGATCCAGGCCGCCTGTACCCTCAAATATGG</b>   | 804 |
|    |           |                                               | R: <b>CCCGAATTCGGTTCCGCACTAGGTGCTGCTG</b>      |     |

\*Sequences recognized by the restriction enzymes used for cloning are presented in bold.

Only primers for constructs presented in Fig. S5 are included in the table. Primers for remaining constructs are available upon request to Andrew Oleinikov.

# indicates two exceptions, where construct was cloned into pHisAdEx vector for expression and functional testing.



## Reference for Supplementary data

- 1 Fastman, Y., Noble, R., Recker, M. & Dzikowski, R. Erasing the epigenetic memory and beginning to switch - the onset of antigenic switching of *var* genes in *Plasmodium falciparum*. *PLoS One* 7, e34168, doi:10.1371/journal.pone.0034168 (2012).
